# Supplementary material for: Identification and Characterization of Immune-Associated MicroRNAs in Silver Carp (Hypophthalmichthys molitrix) Responding to Aeromonas veronii and LPS Stimulation
Source: MDPI journal article supplement (doi:10.3390/ani14020285), 2024-01-17
Supplement: s1 [file s1]

Appendix A. Supplementary Materials

| Primer ID | Sequences (5' to 3') |
|-----------|----------------------|
|-----------|----------------------|

Identification and Characterization of Immune-associated miRNAs in Silver Carp (*Hypophthalmichthys molitrix*) Responding to *Aeromonas veronii* and LPS Stimulation

Meng Liu<sup>†</sup>, Huan Tang<sup>†</sup>, Kun Gao, Xiqing Zhang, Zihan Yang, Xiaofeng Shan<sup>\*</sup> and Yunhang Gao<sup>\*</sup>

College of Veterinary Medicine, Jilin Agricultural University, Changchun 130118, China. liumeng4610@163.com (M.L.), tanghuan202308@163.com (H.T.), KunGao213@163.com (K.G.), Zhangxiqing1020@163.com (X.Z.), yyangzihan622@163.com (Z.Y.)

<sup>\*</sup> Corresponding authors: *E-mail*: gaoyunhang@163.com (Y. G.), sxf1997@163.com (X.S.).

Author to whom correspondence should be addressed. gaoyunhang@163.com (Y.G.), Tel.: +86 13159752912 (Y.G.).

<sup>†</sup> Each of these authors has contributed equally to this work.

Table S1. qRT-PCR primer sequence information in this study

---

|                    |                                                    |
|--------------------|----------------------------------------------------|
| RT-miR-151-5p      | GTCGTATCCAGTGCAGGGTCCGAGGTATTCGCACTGGATACGACACTAGA |
| miR-151-5p-F       | CGCGTCGAGGAGCTCACAG                                |
| RT-miR-27b-5p      | GTCGTATCCAGTGCAGGGTCCGAGGTATTCGCACTGGATACGACGTTAC  |
| miR-27b-5p-F       | CGCGAGAGCTTAGCTGATTG                               |
| RT-miR-99-1-p3     | GTCGTATCCAGTGCAGGGTCCGAGGTATTCGCACTGGATACGACGAGACC |
| miR-99-1-p3-F      | CGCGCAAGCTCGTTTCTATG                               |
| RT-miR-30b-5p      | GTCGTATCCAGTGCAGGGTCCGAGGTATTCGCACTGGATACGACAGCTGA |
| miR-30b-5p-F       | GCGCGTGTA AACATCCTACAC                             |
| RT-miR-1388-5p     | GTCGTATCCAGTGCAGGGTCCGAGGTATTCGCACTGGATACGACACATTC |
| miR-1388-5p-F      | GCGAGGACTGTCCAACCTGA                               |
| RT-miR-99b-5p      | GTCGTATCCAGTGCAGGGTCCGAGGTATTCGCACTGGATACGACGCAAGT |
| miR-99b-5p-F       | GCGAACCCGTAGATCCGA                                 |
| RT-miR-187-5p      | GTCGTATCCAGTGCAGGGTCCGAGGTATTCGCACTGGATACGACCCATGT |
| miR-187-5p-F       | GCGGGCTGCAACACAGG                                  |
| RT-miR-24          | GTCGTATCCAGTGCAGGGTCCGAGGTATTCGCACTGGATACGACACTGTT |
| miR-24-F           | CGTGGCTCAGTTCAGCAGG                                |
| Universal primer-R | AGTGCAGGGTCCGAGGTATT                               |
| U6-F               | CTCGCTTCGGCAGCACA                                  |
| U6-R               | AACGCTTCACGAATTTGCGT                               |
| TNF- $\alpha$ -F   | CAGGGCTGCCATCCATTTA                                |
| TNF- $\alpha$ -R   | AAGCCGCCTGAAGAGAAAG                                |
| IL6-F              | CGTATGAAGGTGTCAGGATCAG                             |
| IL6-R              | CCACGTCAGGACACTGTAAAT                              |
| IL1 $\beta$ -F     | GGTGAAGAAGAGGTGCTCAA                               |
| IL1 $\beta$ -R     | AAGGTCGTGCTGGTCTTATC                               |
| GAPDH-F            | GGGATTGTCGCTCATCTATCTT                             |
| GAPDH-R            | GTTGCTGTACCCAAACTCATTG                             |

---

**Table S2.** The library information in this study

| <b>sample</b> | <b>Raw reads</b> | <b>3ADT&amp;length filter</b> | <b>Junk reads</b> | <b>Clean reads</b> | <b>Rfam</b> | <b>mRNA</b> | <b>Repeats</b> | <b>valid reads</b> |
|---------------|------------------|-------------------------------|-------------------|--------------------|-------------|-------------|----------------|--------------------|
| CK1           | 13819794         | 7438749                       | 67466             | 6313579            | 542111      | 1322382     | 1227           | 4719375            |
| CK2           | 9662066          | 5707222                       | 118355            | 3836489            | 768205      | 1887821     | 1233           | 1426761            |
| CK3           | 16977352         | 11828177                      | 75149             | 5074026            | 631364      | 1738721     | 1338           | 2991109            |
| AV1           | 19244994         | 12105695                      | 8736              | 7130563            | 328224      | 2793513     | 3412           | 4064183            |
| AV2           | 11177077         | 5763713                       | 36258             | 5377106            | 429047      | 1501152     | 1193           | 3690472            |
| AV3           | 19848401         | 6151425                       | 19797             | 13677179           | 626108      | 4405500     | 6642           | 8913754            |
| LPS1          | 15820469         | 10035795                      | 22596             | 5762078            | 584508      | 2430017     | 2715           | 3104373            |
| LPS2          | 15986532         | 7376376                       | 24105             | 8586051            | 728380      | 3033965     | 3105           | 5221597            |
| LPS3          | 20915196         | 7047560                       | 23939             | 13843697           | 1056832     | 4991017     | 5106           | 8271890            |

3ADT&length filter: reads removed due to 3ADT not found and length with <18 nt and >25 nt were removed (for plants); length with <18 and >26nt were removed (for animals).

Junk reads: Junk: >=2N, >=7A, >=8C, >=6G, >=7T, >=10Dimer, >=6Trimer, or >=5Tetramer.

Clean reads: equal to raw reads - 3ADT&length filter - Junk reads.

Rfam: Collection of many common non-coding RNA families except microRNA; <http://rfam.janelia.org>.

Repeats: Prototypic sequences representing repetitive DNA from different eukaryotic species; <http://www.girinst.org/replibase>.

**Table S3.** The top 15 significant DE miRNAs in the group (AV vs. CK)

| miR_name           | miR_seq                   | up/down | fold_change(AV(mean)/CK(mean)) | log2(fold_change) | pvalue(t_test) | CK(mean) | AV(mean) |
|--------------------|---------------------------|---------|--------------------------------|-------------------|----------------|----------|----------|
| <b>miR-151-5p</b>  | TCGAGGAGCTCACAGTCTAGT     | down    | 0.13                           | -2.89             | 0.0008         | 44       | 6        |
| <b>miR-27b-5p</b>  | AGAGCTTAGCTGATTGGTGAAC    | up      | 1.84                           | 0.88              | 0.0029         | 183      | 337      |
| miR-210-5p         | AGCCACTGACTAACGCACATTG    | up      | 1.38                           | 0.47              | 0.0049         | 250      | 346      |
| <b>miR-99-1</b>    | CAAGCTCGTTTCTATGGGTCTC    | up      | 11.06                          | 3.47              | 0.0061         | 8        | 86       |
| <b>miR-30b-5p</b>  | TGTAAACATCCTACACTCAGCT    | up      | 1.74                           | 0.80              | 0.0077         | 11,261   | 19,628   |
| <b>miR-1388-5p</b> | AGGACTGTCCAACCTGAGAATGT   | down    | 0.43                           | -1.23             | 0.0097         | 735      | 312      |
| miR-26a-5p         | TTCAAGTAATCCAGGATAGGCTTTT | up      | 1.82                           | 0.86              | 0.0099         | 243      | 441      |
| <b>miR-99b-5p</b>  | AACCCGTAGATCCGAACTTGC     | down    | 0.38                           | -1.38             | 0.0101         | 164      | 63       |
| <b>miR-187-5p</b>  | GGCTGCAACACAGGACATGG      | down    | 0.35                           | -1.52             | 0.0140         | 804      | 281      |
| <b>miR-24</b>      | TGGCTCAGTTCAGCAGGAACAGT   | down    | 0.68                           | -0.56             | 0.0140         | 2,659    | 1,802    |
| let-7a-5-3p        | CTATACAGTCTATTGCCTTCCT    | up      | 2.18                           | 1.12              | 0.0176         | 142      | 309      |
| miR-125b-5p        | TCCCTGAGACCCTAACTTGTGA    | up      | 1.59                           | 0.66              | 0.0176         | 15,359   | 24,346   |
| miR-146-3p         | ATCTATGGGCTCAGTTCTTCTG    | up      | 4.72                           | 2.24              | 0.0177         | 111      | 523      |
| miR-455-3p         | TGCAGTCCATGGGCATATACAC    | up      | 2.56                           | 1.35              | 0.0184         | 72       | 184      |
| miR-16b            | TAGCAGCATGTAAATATTGGA     | up      | 1.11                           | 0.15              | 0.0196         | 6,092    | 6,771    |

red is  $p$  value < 0.001, orange is  $p$  value < 0.01, blue is  $p$  value < 0.05

**Table S4.** The top 15 significant DE miRNAs in the group (LPS vs. CK)

| miR name           | miR seq                 | up/down | fold change(LPS(mean)/CK(mean)) | log2(fold change) | pvalue(t test) | CK(mean) | LPS(mean) |
|--------------------|-------------------------|---------|---------------------------------|-------------------|----------------|----------|-----------|
| <b>miR-151-5p</b>  | TCGAGGAGCTCACAGTCTAGT   | down    | 0.09                            | -3.53             | 0.0014         | 44       | 4         |
| <b>miR-30b-5p</b>  | TGTAAACATCCTACACTCAGCT  | up      | 1.85                            | 0.89              | 0.0029         | 11,261   | 20,862    |
| <b>miR-24</b>      | TGGCTCAGTTCAGCAGGAACAGT | down    | 0.67                            | -0.57             | 0.0034         | 2,659    | 1,786     |
| miR-29a-p5         | ACTGATTCCTCTGGTGCTGAGA  | up      | 1.67                            | 0.74              | 0.0040         | 475      | 791       |
| <b>miR-187-5p</b>  | GGCTGCAACACAGGACATGG    | down    | 0.28                            | -1.85             | 0.0047         | 804      | 223       |
| miR-92a-3p         | TATTGCACTTGTCCCGGCCTGT  | up      | 1.34                            | 0.42              | 0.0049         | 22,888   | 30,648    |
| let-7g-5p          | TGAGGTAGTAGTTTGTATAGTTA | up      | 1.68                            | 0.74              | 0.0052         | 487      | 815       |
| let-7f             | TGAGGTAGTAGTTTGTATAGTT  | up      | 1.31                            | 0.39              | 0.0060         | 25,049   | 32,820    |
| miR-128-3p         | TCACAGTGAACCGGTCTCTTT   | up      | 1.37                            | 0.46              | 0.0062         | 5,574    | 7,652     |
| <b>miR-99-1</b>    | CAAGCTCGTTTCTATGGGTCTC  | up      | 7.06                            | 2.82              | 0.0133         | 8        | 55        |
| miR-27b-5p         | AGAGCTTAGCTGATTGGTGAAC  | up      | 1.68                            | 0.75              | 0.0146         | 183      | 307       |
| <b>miR-99b-5p</b>  | AACCCGTAGATCCGAACCTGC   | down    | 0.35                            | -1.53             | 0.0147         | 164      | 57        |
| <b>miR-30d-3p</b>  | CTTTCAGTCGGATGTTTGCAGC  | down    | 0.65                            | -0.63             | 0.0148         | 4,195    | 2,713     |
| miR-24b-5p         | TGCCTGCTGAACTGGTATCAGT  | up      | 6.34                            | 2.66              | 0.0151         | 14       | 89        |
| <b>miR-1388-5p</b> | AGGACTGTCCAACCTGAGAATGT | down    | 0.51                            | -0.98             | 0.0154         | 735      | 373       |

red is  $p$  value<0.001,orange is  $p$  value <0.01,blue is  $p$  value<0.05.

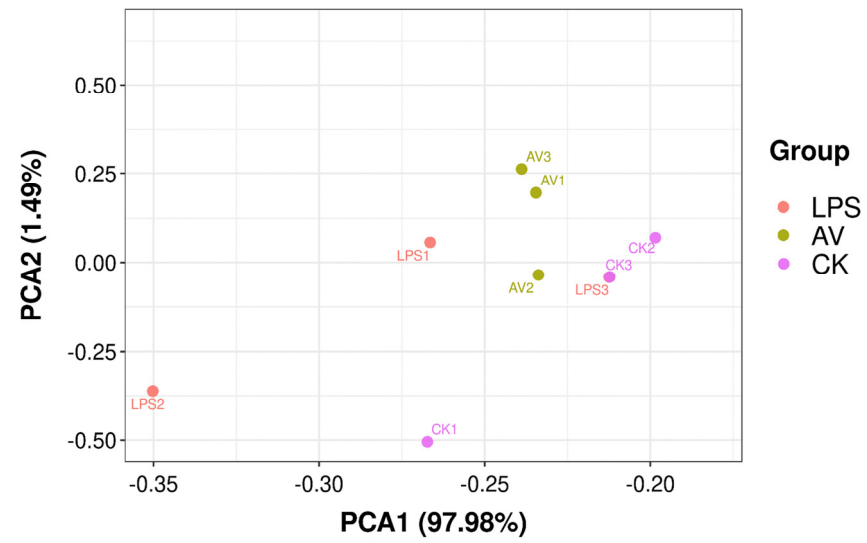

**Figure S1.** Principal Components Analysis (PCA) of miRNA-seq results.

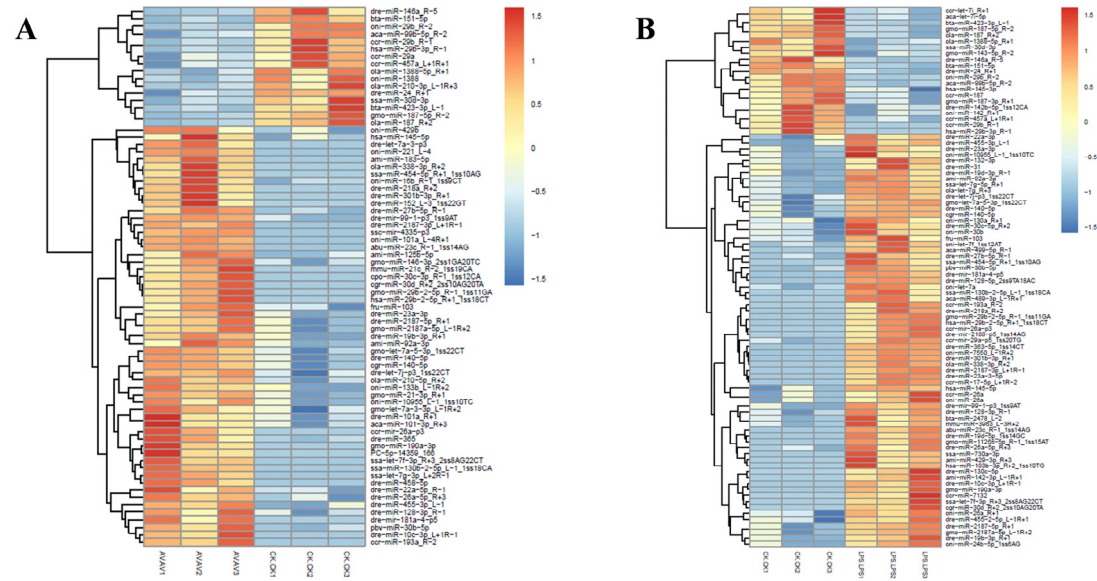

**Figure S2.** The clustering figures of DE miRNAs in two challenge groups. (A) CK vs. AV; (B) CK vs. LPS; Red indicates high expression of miRNAs, dark blue indicates low expression of miRNAs.
